# Supplementary material
Source: Research Square preprint supplement (doi:10.21203/rs.3.rs-9889895/v1)
Supplement: Supplementary file 1 [file ec3af81d2997ec557939ca9f.pdf]

# Supplementary Material

A leakage-controlled stress-test framework for unsupervised cardiometabolic biomarker phenotyping in NHANES

Krishna Sai Pokala

## Supplementary scope

This supplement provides the technical audit trail for the preprint reporting package. Raw NHANES source files are not redistributed. The repository and submission package provide source code, aggregate tables, figures, and manuscript materials generated from the final v2-plus results object.

## S1. Leakage-control roles and variable domains

| Domain                                           | Primary clustering variables                                | Held-out post-hoc or sensitivity role                    |
|--------------------------------------------------|-------------------------------------------------------------|----------------------------------------------------------|
| Age                                              | Adult age                                                   | Cohort criterion and descriptive context                 |
| Adiposity                                        | Body mass index; waist circumference                        | Obesity and central-obesity indicators                   |
| Blood pressure                                   | Mean systolic and diastolic blood pressure                  | Hypertension indicator                                   |
| Glycemia                                         | HbA1c; glucose                                              | Diabetes and prediabetes indicators                      |
| Lipids                                           | Triglycerides; HDL cholesterol; LDL cholesterol             | Dyslipidemia and metabolic-syndrome components           |
| Renal                                            | eGFR; urinary albumin-to-creatinine ratio                   | Albuminuria and CKD-risk indicators                      |
| Inflammation / hematologic                       | High-sensitivity C-reactive protein; white blood cell count | Descriptive inflammatory and hematologic context         |
| Demographic, socioeconomic, and survey variables | Excluded from primary clustering                            | Sensitivity analysis and population-oriented description |

## S2. Final seed diagnostics

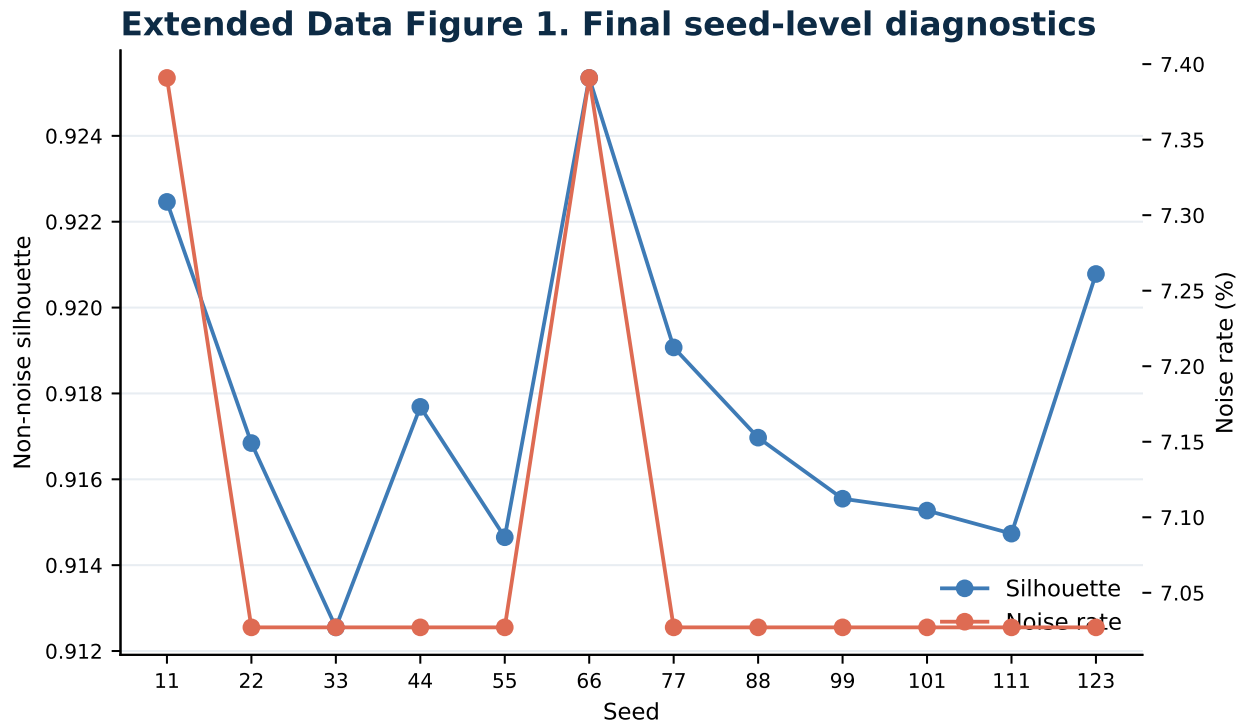

**Figure 1:** Final seed-level diagnostics across the 12 final seeds.

| Seed | Clusters | Noise rate | Mean membership | Non-noise silhouette |
|------|----------|------------|-----------------|----------------------|
| 11   | 3        | 0.0739     | 0.846           | 0.922                |
| 22   | 3        | 0.0703     | 0.849           | 0.917                |
| 33   | 3        | 0.0703     | 0.837           | 0.913                |
| 44   | 3        | 0.0703     | 0.852           | 0.918                |
| 55   | 3        | 0.0703     | 0.842           | 0.915                |
| 66   | 3        | 0.0739     | 0.857           | 0.925                |
| 77   | 3        | 0.0703     | 0.834           | 0.919                |
| 88   | 3        | 0.0703     | 0.854           | 0.917                |
| 99   | 3        | 0.0703     | 0.844           | 0.916                |
| 101  | 3        | 0.0703     | 0.844           | 0.915                |
| 111  | 3        | 0.0703     | 0.850           | 0.915                |
| 123  | 3        | 0.0703     | 0.843           | 0.921                |

### S3. Triglycerides variable harmonization and missingness

**Supplementary Table S3.** Triglycerides harmonization and missingness in the discovery cycle.

| Item                                    | Value                                                            |
|-----------------------------------------|------------------------------------------------------------------|
| Selected 2021–2023 triglycerides column | LBXTLG                                                           |
| Alias set checked                       | LBXTLG; LBXTR; LBXSTR                                            |
| Missingness                             | 2,969 participants (49.1%)                                       |
| Primary-feature status                  | Included as an objective lipid feature; interpreted with caution |

The triglycerides variable was included after alias resolution to LBXTLG. Because missingness was substantial, lipid-domain findings were interpreted with caution, and the limitation is stated explicitly in the manuscript and supplement. This table makes the harmonization decision and missingness level visible for reader and reviewer assessment.

### S4. Feature-block ablation summary

| Ablation                  | Mean ARI versus full objective reference |
|---------------------------|------------------------------------------|
| Numeric-only objective    | 0.995                                    |
| Remove liver/inflammation | 0.984                                    |
| Remove renal              | 0.975                                    |
| Remove glyceimic          | 0.969                                    |
| Remove hematologic        | 0.966                                    |
| Remove age                | 0.966                                    |
| Remove adiposity          | 0.935                                    |
| Remove blood pressure     | 0.922                                    |
| Add demographics          | 0.650                                    |
| Remove lipids             | 0.263                                    |

### S5. Temporal replication best matches

| Discovery-to-replication match            | Profile correlation | Euclidean distance |
|-------------------------------------------|---------------------|--------------------|
| D1 lower-glycemic central-adiposity -> R1 | 0.909               | 0.208              |
| D0 lipid-prediabetes -> R3                | 0.861               | 0.121              |
| D2 higher BP/renal-risk -> R1             | 0.714               | 0.208              |

### S6. Machine-readable tables

The submission package includes machine-readable CSV files for final phenotype groups, selected post-hoc enrichment signals, model/stability audit, phenotype profiles, full post-hoc enrichment, ablation summaries, and temporal replication matches. These tables are intended to support reviewer audit and downstream reproduction of aggregate reporting artifacts.
